# Supplementary material for: The BCL-2 pathway preserves mammalian genome integrity by eliminating recombination-defective oocytes
Source: PubMed Central journal article supplement (PMC7248069; doi:10.1038/s41467-020-16441-z), 2020-05-25
Supplement: 41467_2020_16441_MOESM1_ESM.pdf [file 41467_2020_16441_MOESM1_ESM.pdf]

## Supplementary Information

E.Elnati et al.

The BCL-2 pathway preserves mammalian genome integrity by eliminating  
recombination-defective oocytes

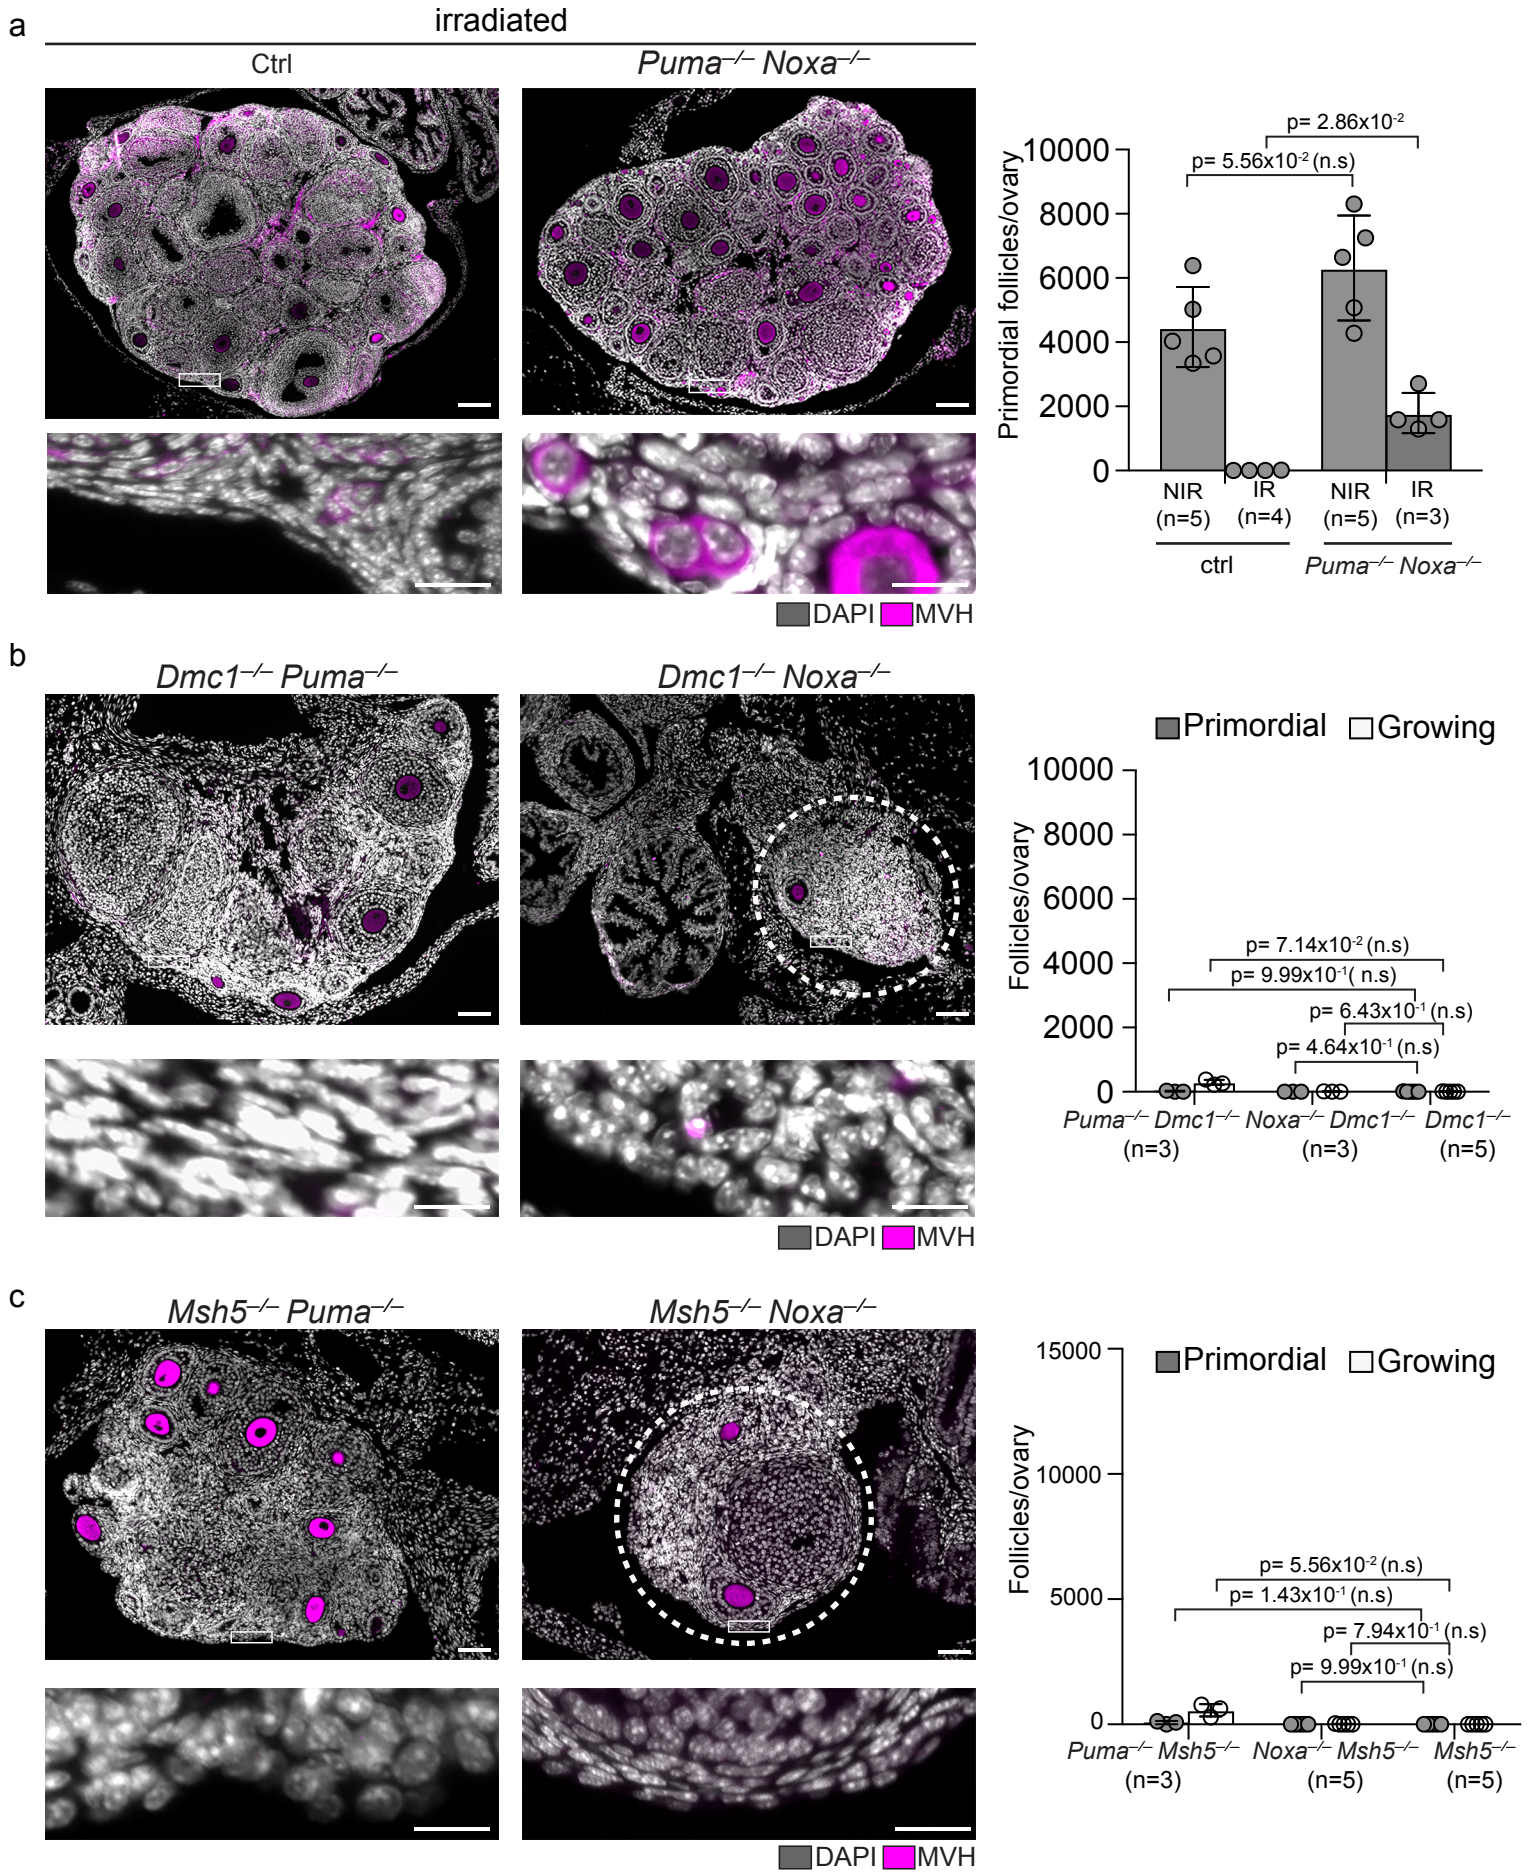

**Supplementary Figure 1:** Effects of *Puma* and *Noxa* on oocyte loss in response to persistent DSBs. **a**, Left: P21 ovary sections immunostained for oocyte marker MVH (magenta), harvested following 0.45Gy IR-exposure at P5. Right: Primordial follicle quantitation at P21. Control (Ctrl) is *Puma*<sup>+/-</sup> *Noxa*<sup>+/-</sup>. Data are represented as mean +/- standard deviation. Error bars indicate 95% confidence intervals. Two-sided Mann-Whitney test used to calculate p-values. White rectangles in upper panels show cortex, which is magnified in lower panels. Scale bars in upper panel 100  $\mu$ m, scale bars in micrographs 25  $\mu$ m. **b,c**, Left: P21 ovary sections immunostained for oocyte marker MVH (magenta). Right: Primordial and total follicle quantitation at P21. Dotted circles outline degenerated ovaries. Data are represented as mean +/- standard deviation. Error bars indicate 95% confidence intervals. Two-sided Mann-Whitney test used to calculate p-values. Scale bars in upper panel 100  $\mu$ m, scale bars in micrographs 25  $\mu$ m.

Supplementary Fig 2

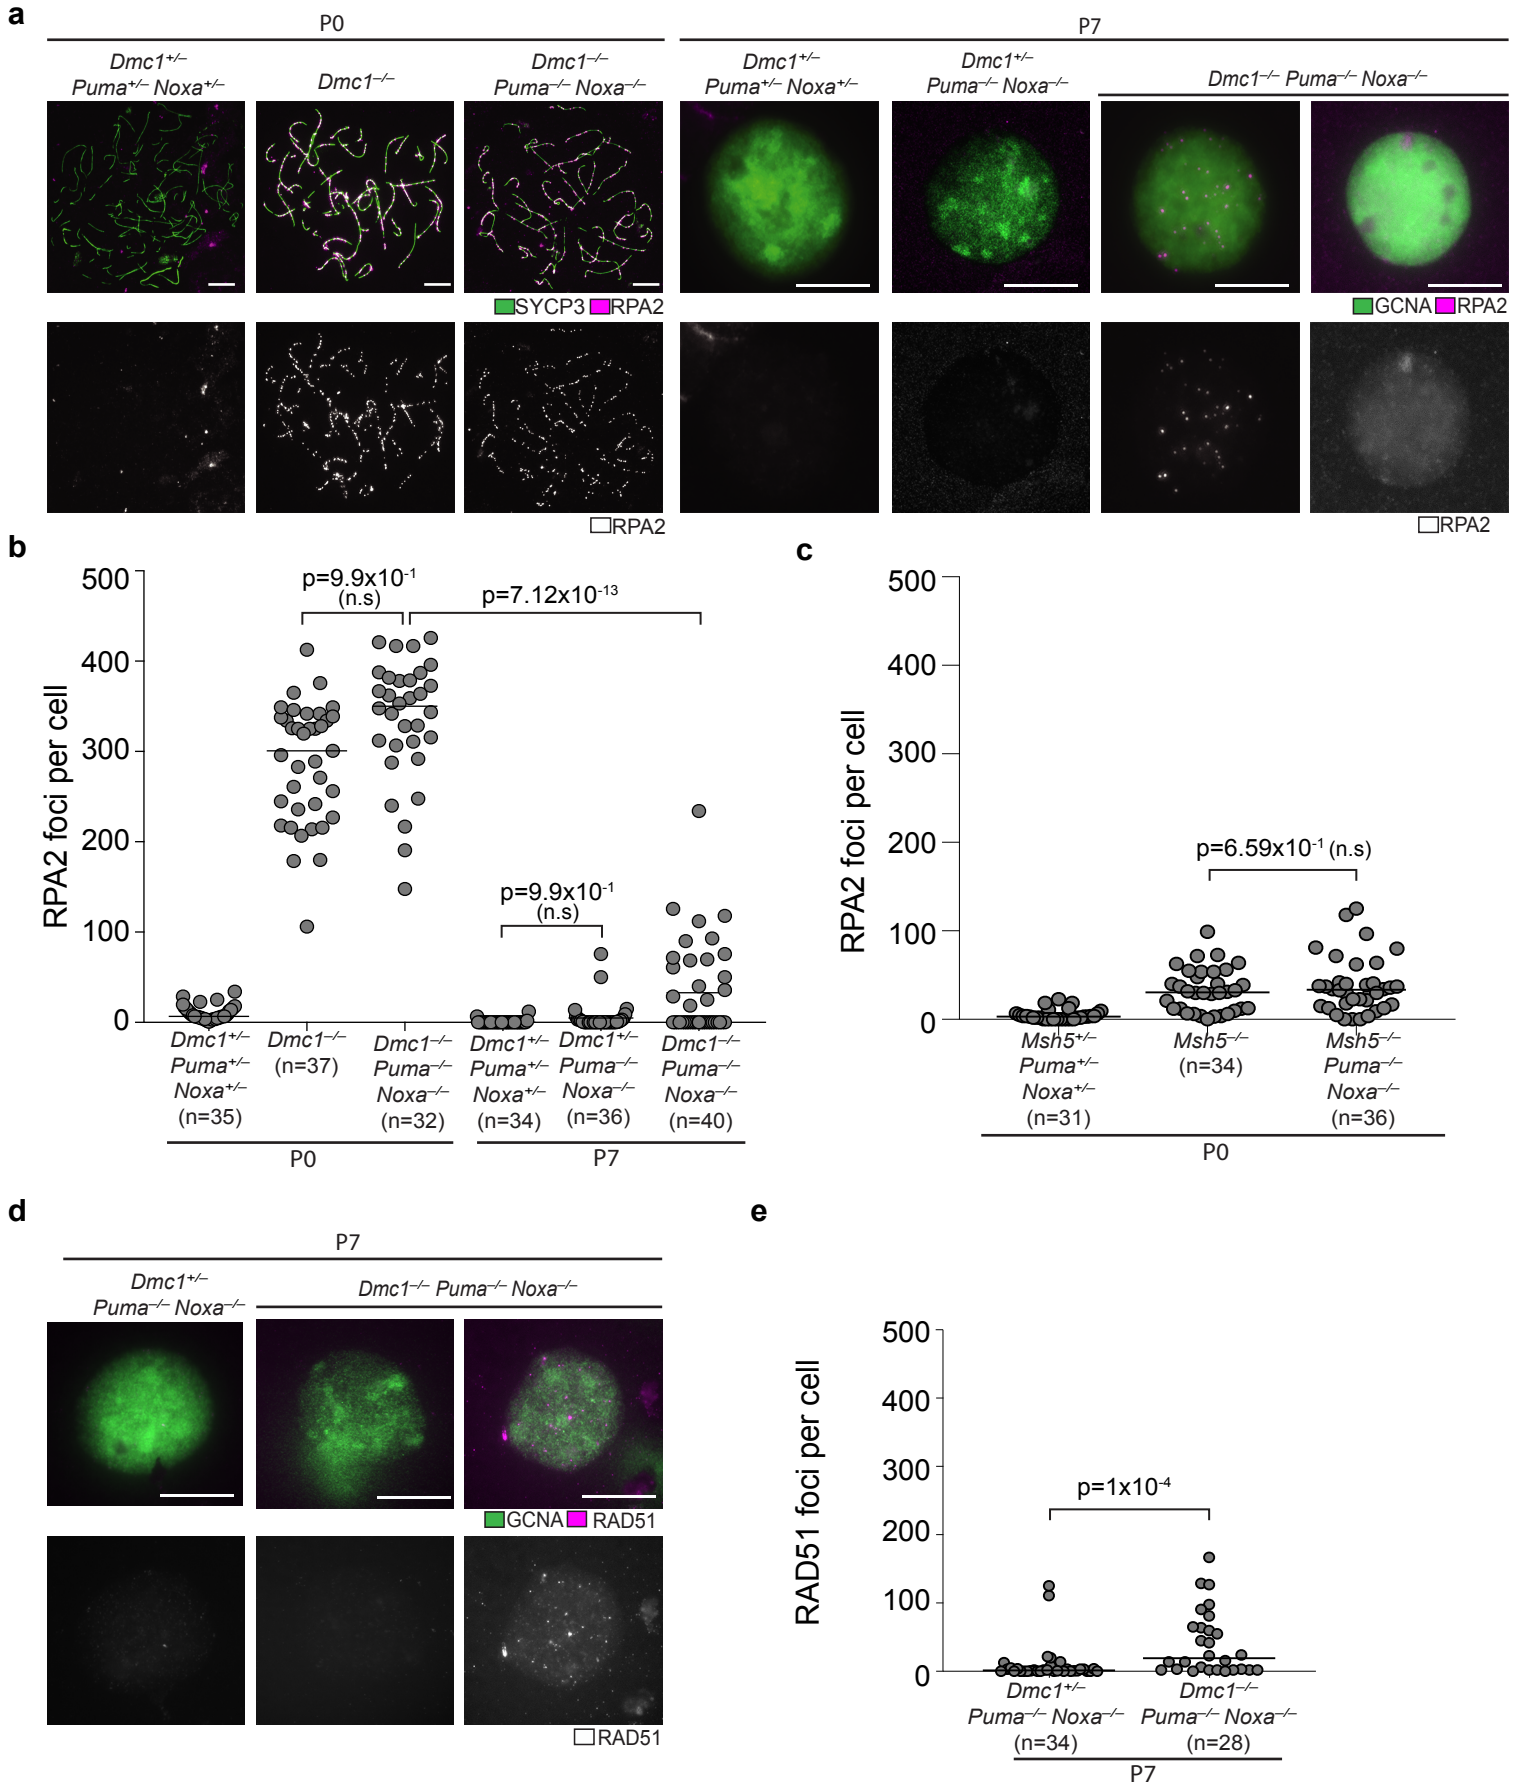

**Supplementary Figure 2:** DSB dynamics in control and mutant oocytes. **a**, P0 and P7 oocytes immunostained for RPA2 (magenta) and either SYCP3 (green; P0) or GCNA (green; P7). Scale bar 10  $\mu$ m. **b,c** RPA2 focus quantitation. Horizontal line indicates the mean. For multiple comparisons, adjusted Kruskal-Wallis test used to calculate p-values otherwise a two-sided Mann-Whitney test is used with 95% confidence intervals. Control 1 (Ctrl 1) is *Dmc1*<sup>+/-</sup> *Puma*<sup>+/-</sup> *Noxa*<sup>+/-</sup>. Control 2 (Ctrl 2) is *Msh5*<sup>+/-</sup> *Puma*<sup>+/-</sup> *Noxa*<sup>+/-</sup>. **d**, P7 oocytes immunostained for Rad51 (magenta) and GCNA (green). Scale bar 10  $\mu$ m. **e**, RAD51 focus quantitation. Horizontal line indicates the mean. Two-sided Mann-Whitney test used to calculate p-values with 95% confidence intervals.

Supplementary Fig 3

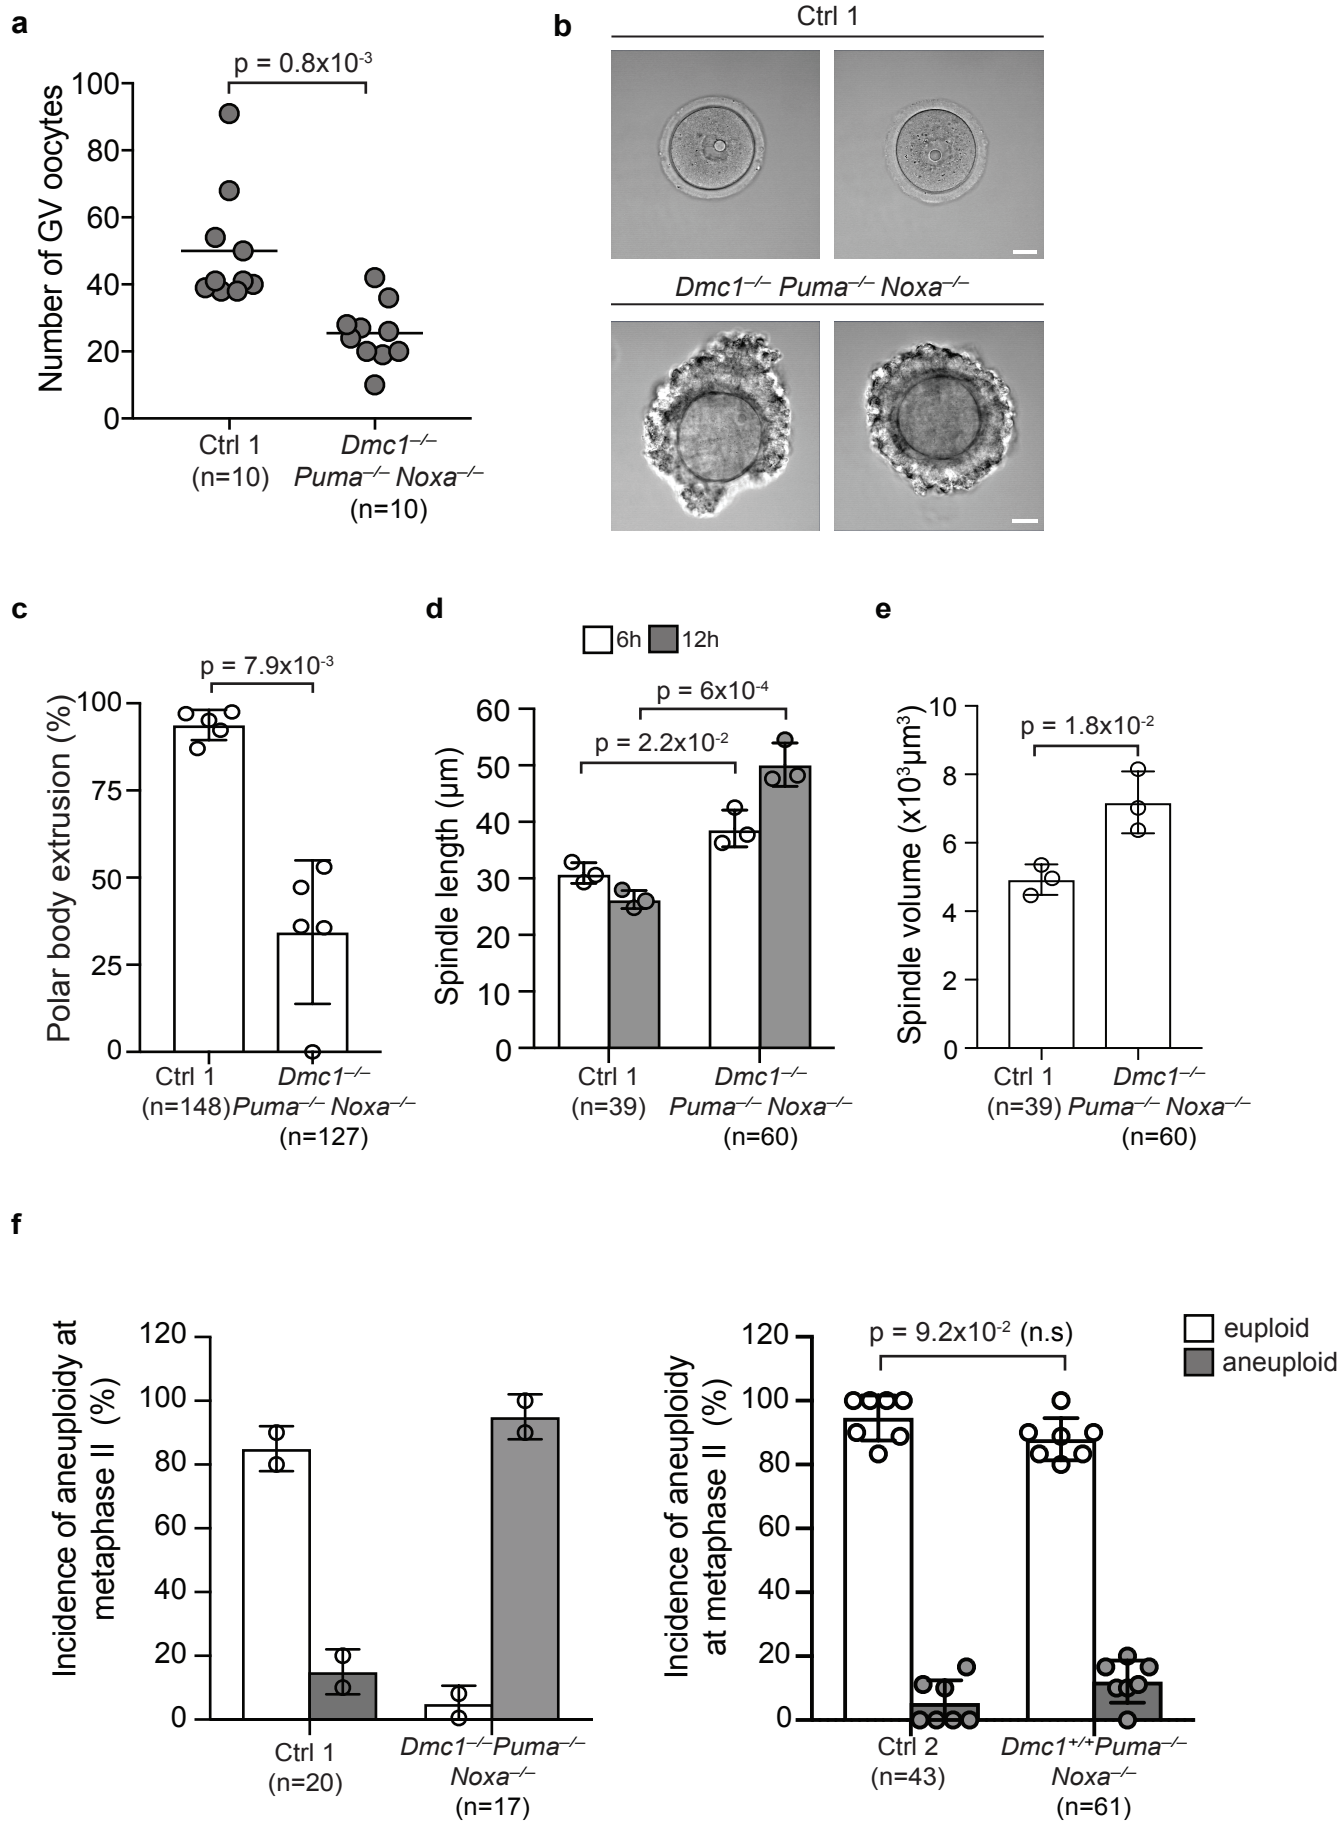

**Supplementary Figure 3:** Efficiency of anaphase progression. **a**, Quantification of germinal vesicle oocytes from Ctrl 1 *Dmc1*<sup>+/-</sup> *Puma*<sup>+/-</sup> *Noxa*<sup>+/-</sup> females (n=10 females) and *Dmc1*<sup>-/-</sup> *Puma*<sup>-/-</sup> *Noxa*<sup>-/-</sup> (n=10 females). N=5 experimental repetitions. **b**, Representative images of germinal vesicle oocytes after gentle stripping with a small-bore pipette, collected from the indicated genotype (N=5 repetitions, n= 10 females). Scale bar 10  $\mu$ m. **c**, Percentage of oocytes exhibiting polar body extrusion in Ctrl 1 (N= 5 experimental repetitions, n=9 females; n=148 oocytes) and *Dmc1*<sup>-/-</sup> *Puma*<sup>-/-</sup> *Noxa*<sup>-/-</sup> oocytes (N= 5 experimental repetitions, n=9 females; n=127 oocytes). **d**, Spindle length at 6 and 12 hours post NEBD of Ctrl 1 (N=3 experimental repetitions; n=7 females; n=39 oocytes) and *Dmc1*<sup>-/-</sup> *Puma*<sup>-/-</sup> *Noxa*<sup>-/-</sup> oocytes (N=3 experimental repetitions; n=7 females; n=60 oocytes). **e**, Spindle volume at 6 hours post NEBD in Ctrl 1 (N=3 experimental repetitions; n= 7 females; n= 39 oocytes) and *Dmc1*<sup>-/-</sup> *Puma*<sup>-/-</sup> *Noxa*<sup>-/-</sup> oocytes (N=3 experimental repetitions; n= 7 females; n=60 oocytes). **f**, Incidence of aneuploidy at metaphase II in Ctrl 1 (*Dmc1*<sup>+/-</sup> *Puma*<sup>+/-</sup> *Noxa*<sup>+/-</sup>; n=2 females, n= 20 oocytes), Ctrl 2 (*Dmc1*<sup>+/+</sup> *Puma*<sup>+/+</sup> *Noxa*<sup>+/+</sup>; n=8 females, n=43 oocytes), *Dmc1*<sup>+/+</sup> *Puma*<sup>-/-</sup> *Noxa*<sup>-/-</sup> (n=8 females, n= 61 oocytes) and *Dmc1*<sup>-/-</sup> *Puma*<sup>-/-</sup> *Noxa*<sup>-/-</sup> (n=2 females, n= 17 oocytes). In all diagrams, data are represented as mean +/- standard deviation. Error bars indicate 95% confidence intervals. Unpaired student two-sided t-test used to calculate p-values.

Supplementary Fig 4

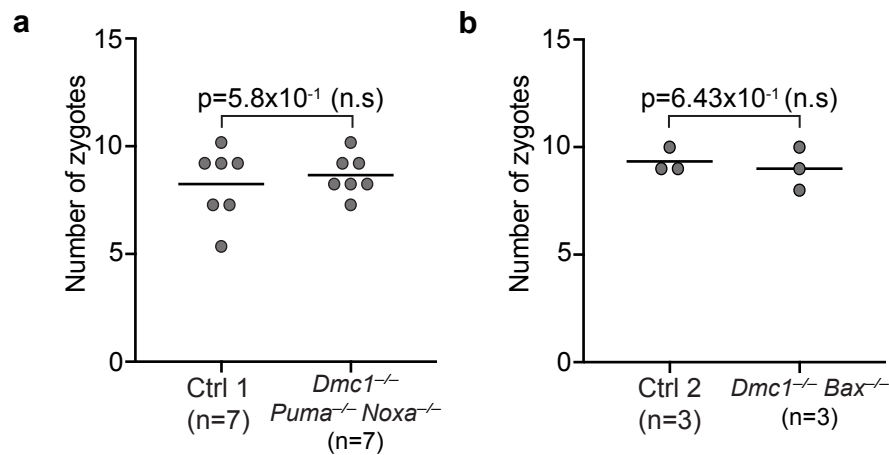

**c**

| sample |                                    | aneuploidy                                                                                                                                                                                                                                                                                                                                                                  |
|--------|------------------------------------|-----------------------------------------------------------------------------------------------------------------------------------------------------------------------------------------------------------------------------------------------------------------------------------------------------------------------------------------------------------------------------|
| 1      | zygote<br>polar body               | +1, +4 (4copies), +7, +8 (4 copies), +9, -10, -11, -12, +13, -15, -16, -17, -18, -X (0 copies), Y<br>+2 (3 cht), -4 (0 cht) , -8 (0 cht), +X (3cht)                                                                                                                                                                                                                         |
| 2      | zygote<br>polar body               | +9, +12 (3 or 4 copies), +X<br>no amplification                                                                                                                                                                                                                                                                                                                             |
| 3      | zygote<br>polar body               | -2, -3, +6, +8, +9, +11, +12, -13, -15, -16, -X<br>-12 (1cht), -X (1cht)                                                                                                                                                                                                                                                                                                    |
| 4      | zygote<br>polar body               | +1, +2, +7, -11, -12, +13, +14 (4 copies), +15, -16, -18, -19, -X<br>-1(1cht), -2(1cht), -7(1cht), +11(3cht), +12(4cht), -13(1cht), -14(0cht), -15(1cht), +16(3cht), +18(3cht), +19(4cht), +X(3cht)                                                                                                                                                                         |
| 5      | zygote<br>polar body               | +4, +5, +6, +7, -8, -10, -12, -13, +14, -15, -18, -19<br>-4(0cht), -5(0cht), -6(0cht), -7(0cht), +8(4cht), -9(0cht), +10(3cht), +11(3cht), +12(3cht), +13(3cht), -14(0cht), -15(0cht), +16(3cht), +17(3cht)+18(3cht), +19(4cht), +X(3cht)                                                                                                                                   |
| 6      | zygote<br>polar body               | no amplification<br>-3(0cht), +4(3cht), -7(0cht), +8(3cht), -14(0cht), -15(0cht), -17(0cht), +18(3cht)                                                                                                                                                                                                                                                                      |
| 7      | zygote<br>polar body<br>polar body | -3, +4, -5, -8, +10, -11, +12(3 or 4 copies), -16, +19<br>-1(0cht), -3(0cht), -5(0cht), -6(0cht), +7(4cht), -8(0cht), -10(0cht), -11(0cht), +12(3cht), -13(0cht), -14(0cht), -16(0cht), -17(0cht)<br>+1(3cht), -2(0cht), +3(3cht), -4(0cht), -5(0cht), -7(0cht), -9(0cht), -10(0cht), -11(0cht), -12(0cht), +13(3cht), +14(3cht), -16(0cht), -18(0cht), -19(0cht), -X(0cht) |

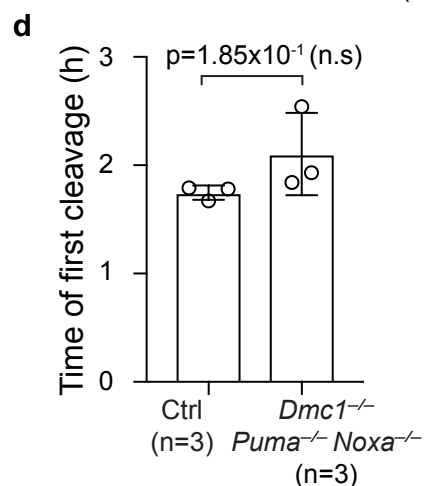



**Supplementary Figure 4:** Aneuploidy analysis. **a,b,** Quantification of zygotes from controls, *Dmc1*<sup>-/-</sup> *Puma*<sup>-/-</sup> *Noxa*<sup>-/-</sup> and *Dmc1*<sup>-/-</sup> *Bax*<sup>-/-</sup> females mated to wild type males. Control 1 (Ctrl 1) is *Dmc1*<sup>+/-</sup> *Puma*<sup>+/-</sup> *Noxa*<sup>+/-</sup>. Control 2 (Ctrl 2) is *Dmc1*<sup>+/-</sup> *Bax*<sup>+/-</sup>. Horizontal line indicates the mean. Unpaired two sided student t-test used to calculate p-values with 95% confidence intervals. **c,** Table representing aneuploidy in zygotes generated from *Dmc1*<sup>-/-</sup> *Puma*<sup>-/-</sup> *Noxa*<sup>-/-</sup> oocytes and their respective polar bodies. “+” gain, “-“ loss, “cht” chromatid. **d,** Time in hours of first cleavage division of zygotes from control (n=3 females; n=48 zygotes, N= 2 experimental repetitions) and *Dmc1*<sup>-/-</sup> *Puma*<sup>-/-</sup> *Noxa*<sup>-/-</sup> (n=3 females; n=37 zygotes, N= 2 experimental repetitions) females. Control (Ctrl) is *Dmc1*<sup>+/-</sup> *Puma*<sup>+/-</sup> *Noxa*<sup>+/-</sup>. Data are represented as mean +/- standard deviation. Error bars indicate 95% confidence intervals. Two-sided unpaired student t-test used to calculate p-values.

Supplementary Fig 5

**a**

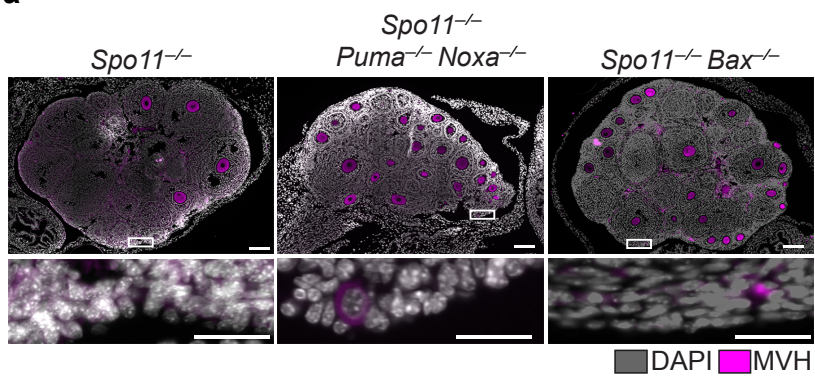

**b**

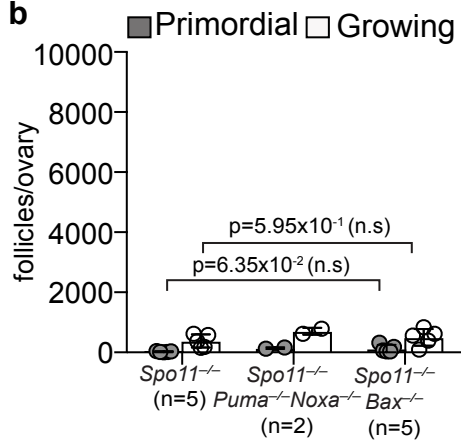

**Supplementary Figure 5:** Distinct apoptotic effectors result in oocyte loss in *Spo11* nulls. **a**, P21 ovary sections immunostained for oocyte marker MVH (magenta). N= 2 experimental repetitions. Scale bars in upper panel 100  $\mu\text{m}$ , scale bars in micrographs 25  $\mu\text{m}$ . **b**, Primordial and total follicle quantitation at P21. Data are represented as mean  $\pm$  standard deviation. Error bars indicate 95% confidence intervals. Two-sided Mann-Whitney test used to calculate p-values.

Supplementary Table 1

| Ctrl 1     |                               |                                     |
|------------|-------------------------------|-------------------------------------|
| MII oocyte | N <sub>e</sub> of chromosomes | N <sub>e</sub> of single chromatids |
| 1 to 18    | 20                            | 0                                   |
| 19         | 21                            | 0                                   |
| 20         | 19                            | 0                                   |

| Ctrl 2     |                               |                                     |
|------------|-------------------------------|-------------------------------------|
| MII oocyte | N <sub>e</sub> of chromosomes | N <sub>e</sub> of single chromatids |
| 1 to 50    | 20                            | 0                                   |
| 51 to 53   | 19                            | 0                                   |

| <i>Dmc1<sup>+/+</sup>Puma<sup>-/-</sup>Noxa<sup>-/-</sup></i> |                               |                                     |
|---------------------------------------------------------------|-------------------------------|-------------------------------------|
| MII oocyte                                                    | N <sub>e</sub> of chromosomes | N <sub>e</sub> of single chromatids |
| 1 to 54                                                       | 20                            | 0                                   |
| 55 to 61                                                      | 19                            | 0                                   |

| <i>Dmc1<sup>-/-</sup>Puma<sup>-/-</sup>Noxa<sup>-/-</sup></i> |                               |                                     |
|---------------------------------------------------------------|-------------------------------|-------------------------------------|
| MII oocyte                                                    | N <sub>e</sub> of chromosomes | N <sub>e</sub> of single chromatids |
| 1                                                             | 13                            | 1                                   |
| 2                                                             | 9                             | 2                                   |
| 3                                                             | 17                            | 4                                   |
| 4                                                             | 19                            | 8                                   |
| 5                                                             | 15                            | 10                                  |
| 6                                                             | 16                            | 2                                   |
| 7                                                             | 6                             | 2                                   |
| 8                                                             | 18                            | 9                                   |
| 9                                                             | 10                            | 6                                   |
| 10                                                            | 14                            | 2                                   |
| 11                                                            | 17                            | 2                                   |
| 12                                                            | 15                            | 20                                  |
| 13                                                            | 21                            | 4                                   |
| 14                                                            | 23                            | 1                                   |
| 15                                                            | 14                            | 1                                   |
| 16                                                            | 17                            | 5                                   |
| 17                                                            | 20                            | 3                                   |

**Supplementary Table 1:** Number of chromosomes and chromatids per oocyte.

Number of chromosomes and chromatids Ctrl 1 *Dmc1*<sup>+/-</sup> *Puma*<sup>+/-</sup> *Noxa*<sup>+/-</sup>, Ctrl 2 *Dmc1*<sup>+/+</sup>*Puma*<sup>+/+</sup> *Noxa*<sup>+/+</sup>, *Dmc1*<sup>+/+</sup> *Puma*<sup>-/-</sup> *Noxa*<sup>-/-</sup> and *Dmc1*<sup>-/-</sup> *Puma*<sup>-/-</sup> *Noxa*<sup>-/-</sup> metaphase II oocytes.
