# Supplementary material for: The BCL-2 pathway preserves mammalian genome integrity by eliminating recombination-defective oocytes
Source: PubMed Central journal article supplement (PMC7248069; doi:10.1038/s41467-020-16441-z), 2020-05-25
Supplement: 41467_2020_16441_MOESM2_ESM.pdf [file 41467_2020_16441_MOESM2_ESM.pdf]

## Description of Additional Supplementary Files

File Name: Supplementary Movie 1

Description: Live imaging of control and Dmc1<sup>-/-</sup> Puma<sup>-/-</sup> Noxa<sup>-/-</sup> oocytes.

File Name: Supplementary Movie 2

Description: Live imaging of embryos from control and Dmc1<sup>-/-</sup> Puma<sup>-/-</sup> Noxa<sup>-/-</sup> mothers.
