# Supplementary material for: The BCL-2 pathway preserves mammalian genome integrity by eliminating recombination-defective oocytes
Source: PubMed Central journal article supplement (PMC7248069; doi:10.1038/s41467-020-16441-z), 2020-05-25
Supplement: 41467_2020_16441_MOESM5_ESM.pdf [file 41467_2020_16441_MOESM5_ESM.pdf]

The full content of this file cannot be displayed with your current PDF viewer. Please update to the latest possible version to view this document.
